# Supplementary figures and images for: Better Regularization for Sequential Decision Spaces: Fast Convergence Rates for Nash, Correlated, and Team Equilibria
Source: Atypon-hosted journal article supplement (doi:10.1287/opre.2021.0633), 2025-02-28

# Battleship (3 turns) – EGT/AS

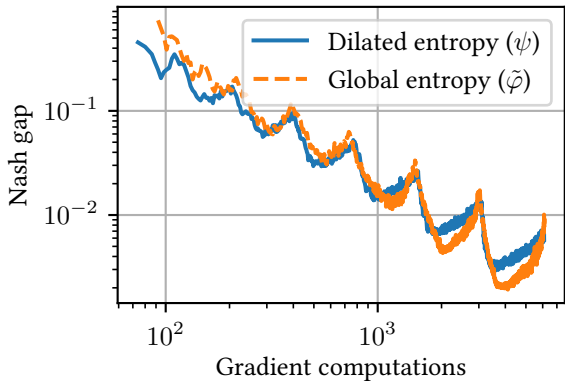

Supplement: opre.2021.0633.cd.zip [file bs_0sum_2x3_3turns_1shipL2v4.pdf › or24_dge/plots/egt_as/bs_0sum_2x3_3turns_1shipL2v4.pdf]

# Battleship (4 turns) – EGT/AS

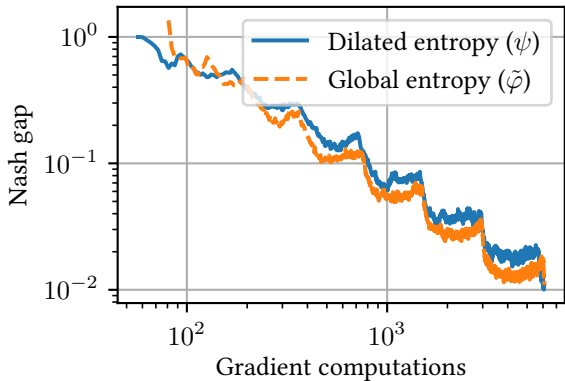

Supplement: opre.2021.0633.cd.zip [file bs_0sum_2x3_4turns_1shipL2v4.pdf › or24_dge/plots/egt_as/bs_0sum_2x3_4turns_1shipL2v4.pdf]

# Goofspiel – EGT/AS

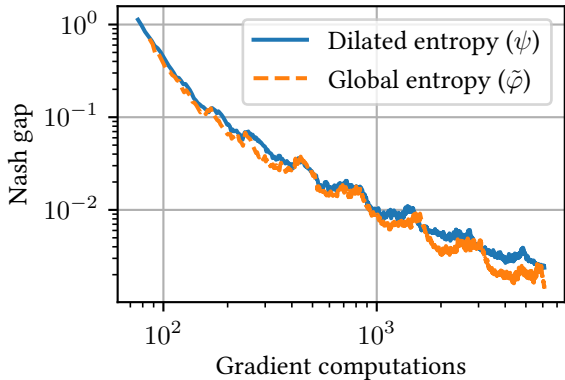

Supplement: opre.2021.0633.cd.zip [file goofspiel_2pl_4ranks.pdf › or24_dge/plots/egt_as/goofspiel_2pl_4ranks.pdf]

# Kuhn poker – EGT/AS

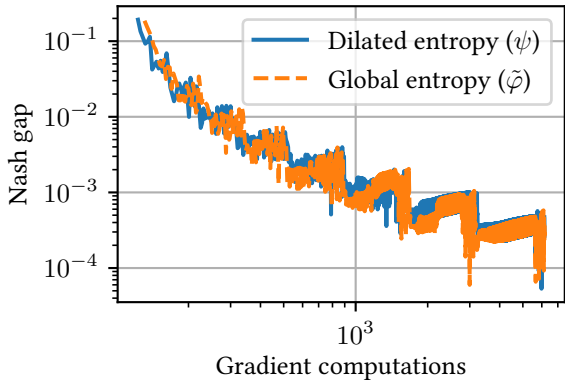

Supplement: opre.2021.0633.cd.zip [file kuhn_2pl_3ranks.pdf › or24_dge/plots/egt_as/kuhn_2pl_3ranks.pdf]

# Liar's Dice – EGT/AS

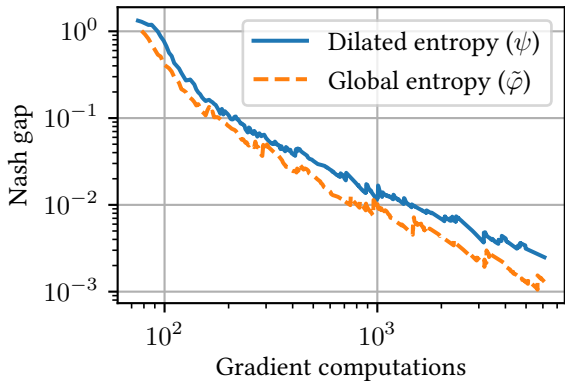

Supplement: opre.2021.0633.cd.zip [file ld_2pl_6faces.pdf › or24_dge/plots/egt_as/ld_2pl_6faces.pdf]

# Leduc poker (13 ranks) – EGT/AS

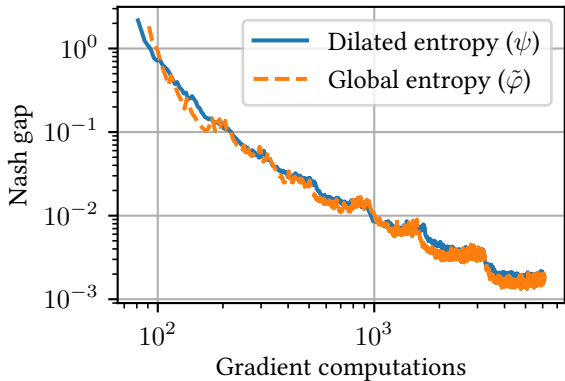

Supplement: opre.2021.0633.cd.zip [file leduc_2pl_13ranks.pdf › or24_dge/plots/egt_as/leduc_2pl_13ranks.pdf]

# Leduc poker (3 ranks) – EGT/AS

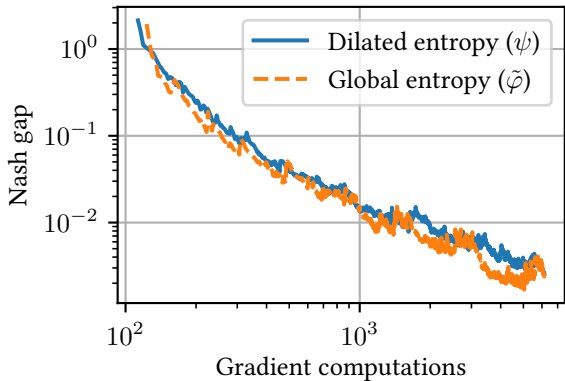

Supplement: opre.2021.0633.cd.zip [file leduc_2pl_3ranks.pdf › or24_dge/plots/egt_as/leduc_2pl_3ranks.pdf]

# Pursuit-evasion (4 turns) – EGT/AS

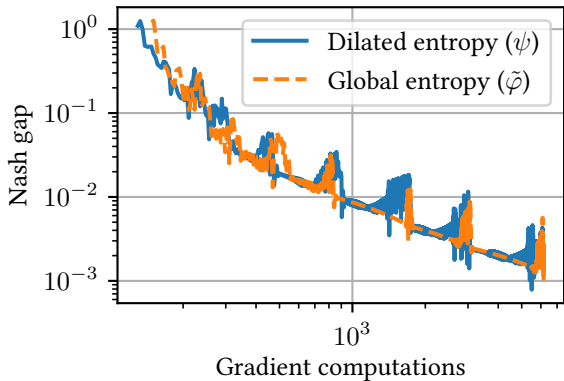

Supplement: opre.2021.0633.cd.zip [file search_game_4turns_0sum.pdf › or24_dge/plots/egt_as/search_game_4turns_0sum.pdf]

# Pursuit-evasion (6 turns) – EGT/AS

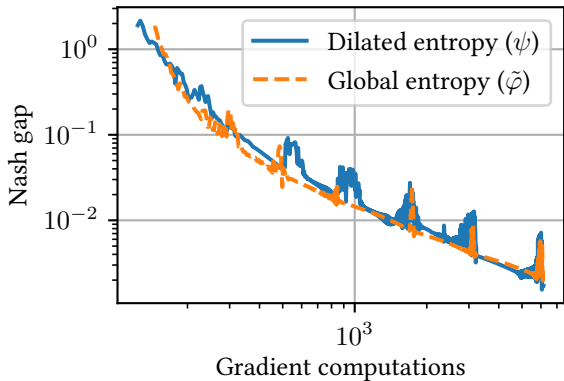

Supplement: opre.2021.0633.cd.zip [file search_game_6turns_0sum.pdf › or24_dge/plots/egt_as/search_game_6turns_0sum.pdf]

# Battleship (3 turns) – EGT

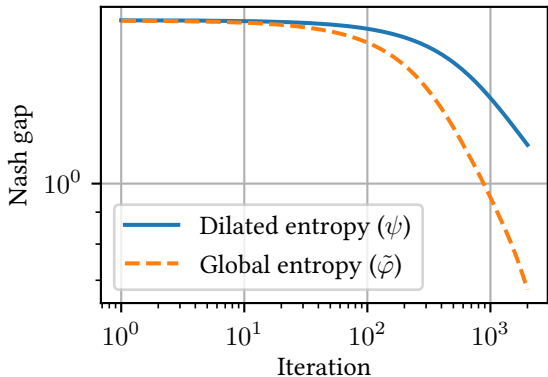

Supplement: opre.2021.0633.cd.zip [file bs_0sum_2x3_3turns_1shipL2v4.pdf › or24_dge/plots/egt_vanilla/bs_0sum_2x3_3turns_1shipL2v4.pdf]

# Battleship (4 turns) – EGT

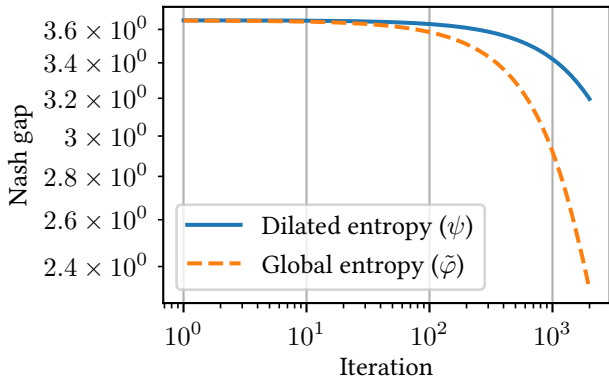

Supplement: opre.2021.0633.cd.zip [file bs_0sum_2x3_4turns_1shipL2v4.pdf › or24_dge/plots/egt_vanilla/bs_0sum_2x3_4turns_1shipL2v4.pdf]

# Goofspiel – EGT

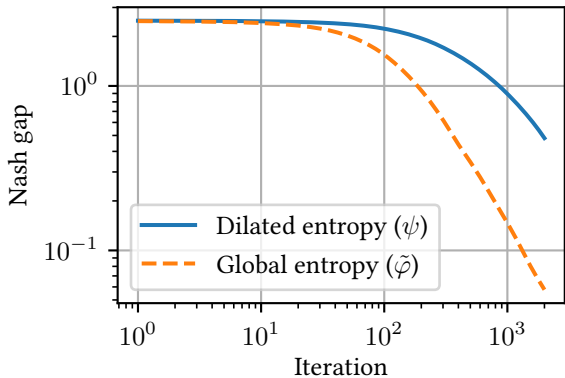

Supplement: opre.2021.0633.cd.zip [file goofspiel_2pl_4ranks.pdf › or24_dge/plots/egt_vanilla/goofspiel_2pl_4ranks.pdf]

# Kuhn poker – EGT

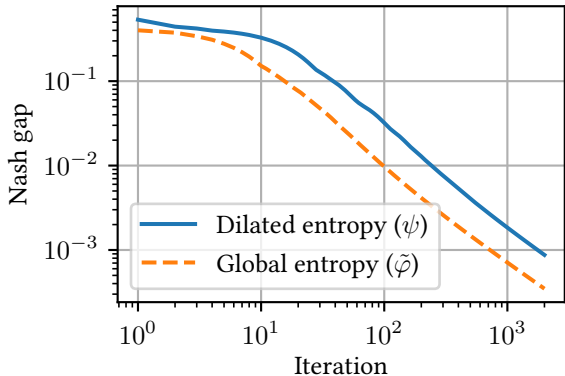

Supplement: opre.2021.0633.cd.zip [file kuhn_2pl_3ranks.pdf › or24_dge/plots/egt_vanilla/kuhn_2pl_3ranks.pdf]

# Liar's Dice – EGT

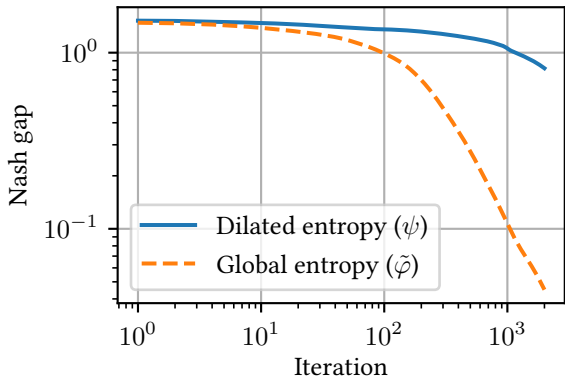

Supplement: opre.2021.0633.cd.zip [file ld_2pl_6faces.pdf › or24_dge/plots/egt_vanilla/ld_2pl_6faces.pdf]

# Leduc poker (13 ranks) – EGT

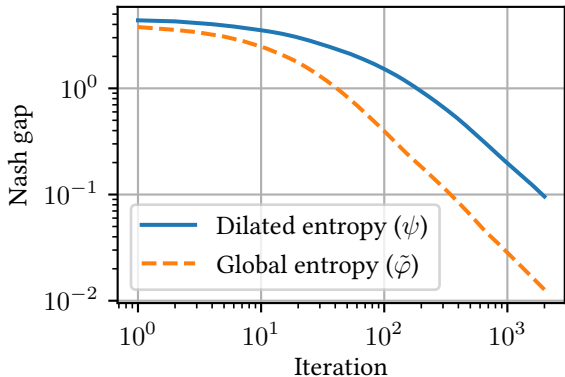

Supplement: opre.2021.0633.cd.zip [file leduc_2pl_13ranks.pdf › or24_dge/plots/egt_vanilla/leduc_2pl_13ranks.pdf]

# Leduc poker (3 ranks) – EGT

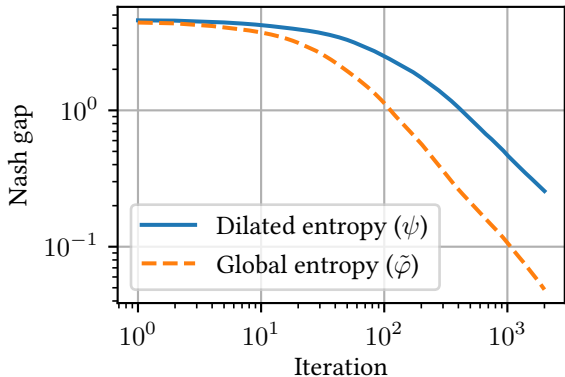

Supplement: opre.2021.0633.cd.zip [file leduc_2pl_3ranks.pdf › or24_dge/plots/egt_vanilla/leduc_2pl_3ranks.pdf]

# Pursuit-evasion (4 turns) – EGT

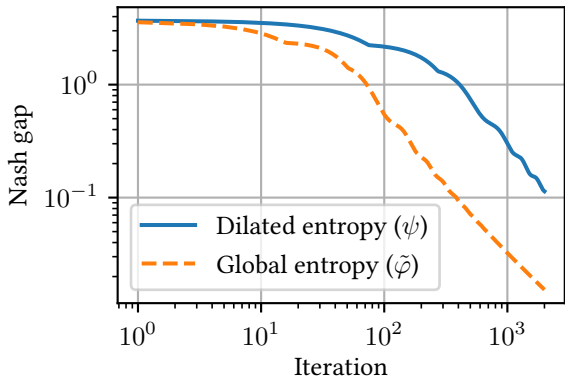

Supplement: opre.2021.0633.cd.zip [file search_game_4turns_0sum.pdf › or24_dge/plots/egt_vanilla/search_game_4turns_0sum.pdf]

# Pursuit-evasion (6 turns) – EGT

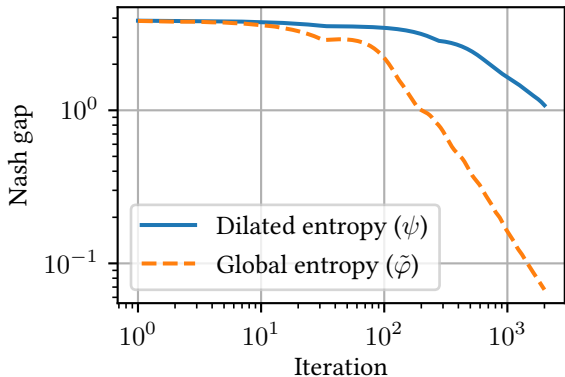

Supplement: opre.2021.0633.cd.zip [file search_game_6turns_0sum.pdf › or24_dge/plots/egt_vanilla/search_game_6turns_0sum.pdf]

# Battleship (3 turns) – MP

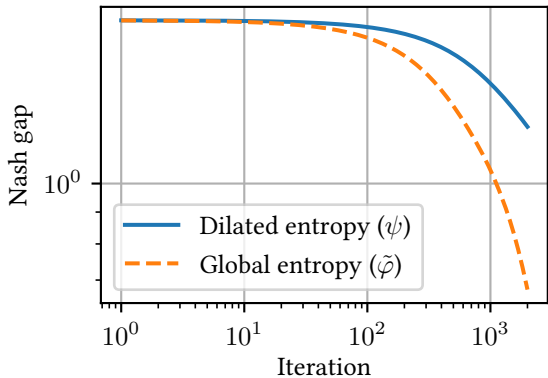

Supplement: opre.2021.0633.cd.zip [file bs_0sum_2x3_3turns_1shipL2v4.pdf › or24_dge/plots/mirror_prox/bs_0sum_2x3_3turns_1shipL2v4.pdf]

# Battleship (4 turns) – MP

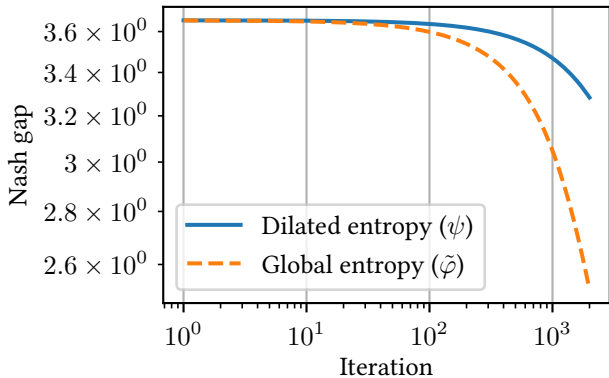

Supplement: opre.2021.0633.cd.zip [file bs_0sum_2x3_4turns_1shipL2v4.pdf › or24_dge/plots/mirror_prox/bs_0sum_2x3_4turns_1shipL2v4.pdf]

# Goofspiel – MP

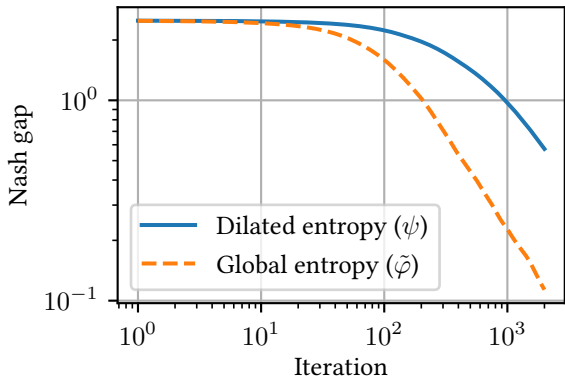

Supplement: opre.2021.0633.cd.zip [file goofspiel_2pl_4ranks.pdf › or24_dge/plots/mirror_prox/goofspiel_2pl_4ranks.pdf]

# Kuhn poker – MP

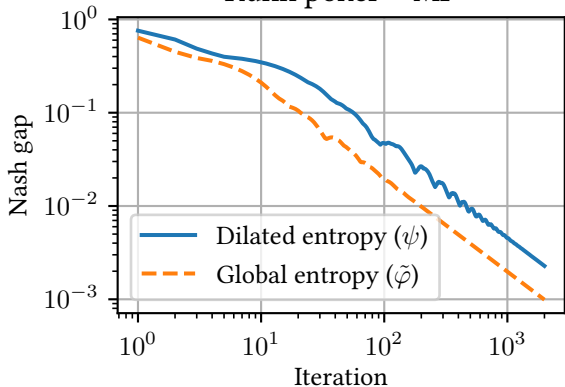

Supplement: opre.2021.0633.cd.zip [file kuhn_2pl_3ranks.pdf › or24_dge/plots/mirror_prox/kuhn_2pl_3ranks.pdf]

# Liar's Dice – MP

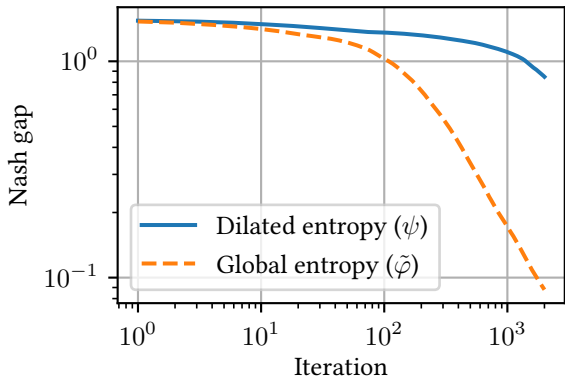

Supplement: opre.2021.0633.cd.zip [file ld_2pl_6faces.pdf › or24_dge/plots/mirror_prox/ld_2pl_6faces.pdf]

# Leduc poker (13 ranks) – MP

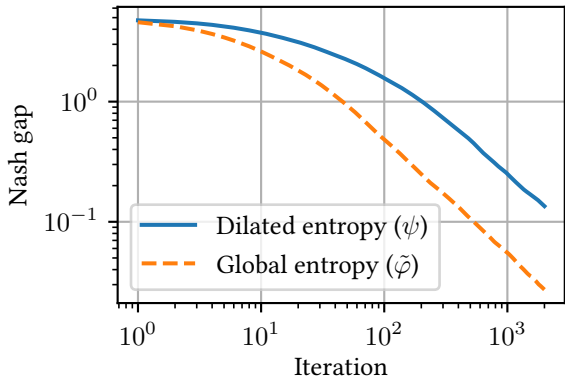

Supplement: opre.2021.0633.cd.zip [file leduc_2pl_13ranks.pdf › or24_dge/plots/mirror_prox/leduc_2pl_13ranks.pdf]

# Leduc poker (3 ranks) – MP

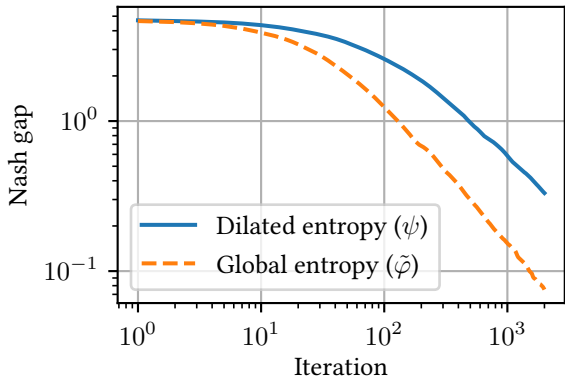

Supplement: opre.2021.0633.cd.zip [file leduc_2pl_3ranks.pdf › or24_dge/plots/mirror_prox/leduc_2pl_3ranks.pdf]

# Pursuit-evasion (4 turns) – MP

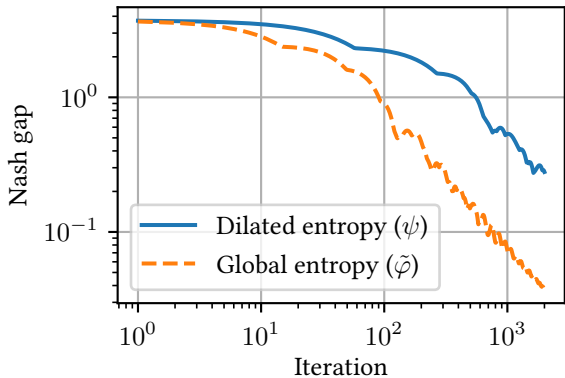

Supplement: opre.2021.0633.cd.zip [file search_game_4turns_0sum.pdf › or24_dge/plots/mirror_prox/search_game_4turns_0sum.pdf]

# Pursuit-evasion (6 turns) – MP

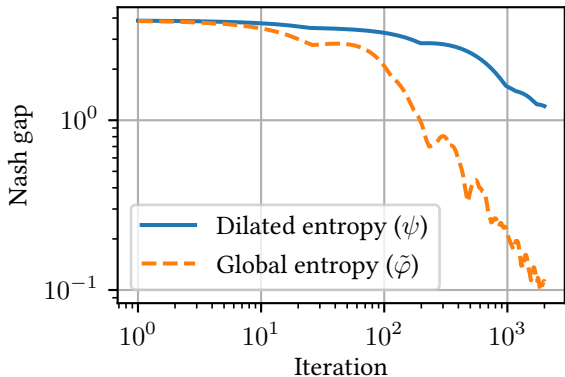

Supplement: opre.2021.0633.cd.zip [file search_game_6turns_0sum.pdf › or24_dge/plots/mirror_prox/search_game_6turns_0sum.pdf]

# General-sum battleship – MP

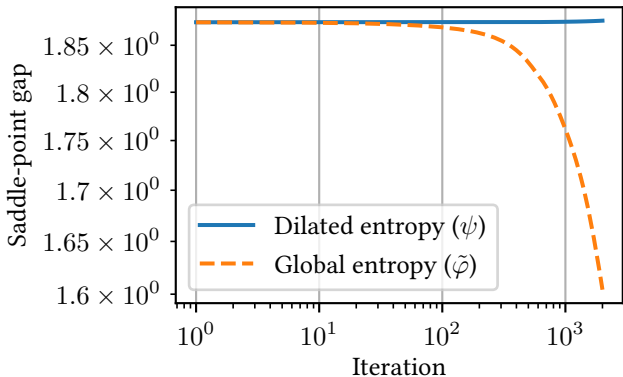

Supplement: opre.2021.0633.cd.zip [file bs_2x2_3turns_1shipL1v4_m2.pdf › or24_dge/plots/nfcce/bs_2x2_3turns_1shipL1v4_m2.pdf]

# General-sum Goofspiel – MP

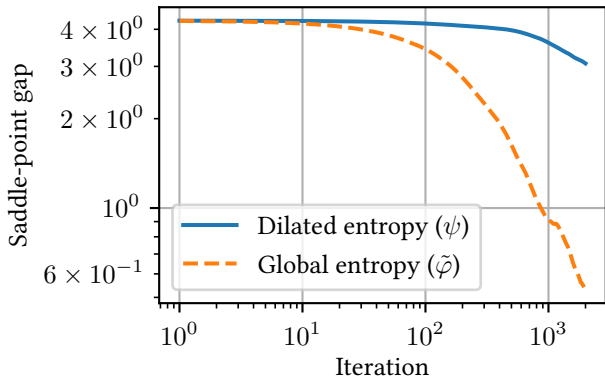

Supplement: opre.2021.0633.cd.zip [file goofspiel_2pl_3ranks_dot.pdf › or24_dge/plots/nfcce/goofspiel_2pl_3ranks_dot.pdf]

# Sheriff game – MP

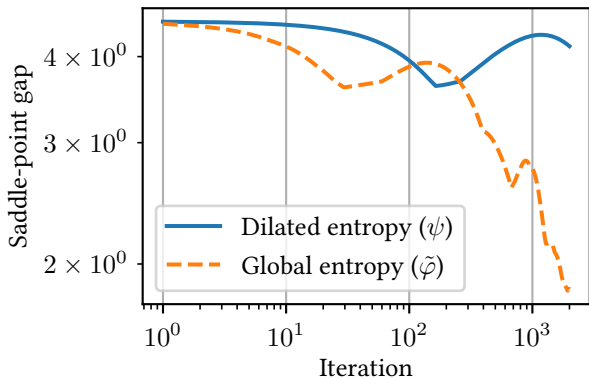

Supplement: opre.2021.0633.cd.zip [file sheriff.pdf › or24_dge/plots/nfcce/sheriff.pdf]
